## CLINICAL CASE SEMINAR

# Sporadic Heterozygous Frameshift Mutation of *HESX1* Causing Pituitary and Optic Nerve Hypoplasia and Combined Pituitary Hormone Deficiency in a Japanese Patient

TOSHIHIRO TAJIMA, TSUKASA HATTORRI, TAKEO NAKAJIMA, KOUJI OKUHARA, KOHEI SATO, SHUJI ABE, JUN NAKAE, AND KENJI FUJIEDA

Department of Pediatrics, Hokkaido University School of Medicine (T.T., K.O., K.S., S.A., J.N., K.F.), Sapporo 060-0835, Japan; Department of Neonatology, Sapporo City Hospital (T.H., T.N.), Sapporo 060-0011, Japan; and Department of Pediatrics, Asahikawa Medical College (J.N., K.F.), Asahikawa 078-8510, Japan

*HESX1/Hesx1* is a member of the paired-like class of homeobox genes and is essential for pituitary and forebrain development. Mice with a targeted homozygous deletion of the *Hesx1* show severe central nervous system defects, absence of optic vesicles, and a very small anterior pituitary gland. This phenotype is similar to the abnormalities observed in the human disorder called septo-optic dysplasia, a syndromic form of congenital hypopituitarism. To date, four missense mutations in the human *HESX1* have been described in individuals with phenotypes ranging from severe septo-optic dysplasia, relatively mild combined pituitary hormone deficiency (CPHD), to isolated GH deficiency. Here we report a Japanese patient with CPHD (GH, TSH, LH, FSH, and ACTH deficiency) due to a novel sporadic *HESX1* mutation. Brain magnetic resonance

imaging examination revealed hypoplastic anterior pituitary, ectopic posterior lobe, and left optic nerve hypoplasia. Molecular analysis identified the insertion of a heterozygous mutation (306/307ins AG) in the exon 2 of the *HESX1*. This mutation changes a reading frame and introduces a premature stop codon soon after the mutation site. Therefore, this mutation would be predicted to generate a protein lacking the carboxyl-terminal homeobox domain (DNA-binding domain) and cause the disease. Family analysis demonstrated that neither of the patient's parents harbored this mutation, indicating that the mutation had arisen *de novo*. In conclusion, a *de novo* heterozygous frameshift mutation in exon 2 of the *HESX1* causes severe CPHD with optic nerve hypoplasia in a human. (*J Clin Endocrinol Metab* 88: 45–50, 2003)

THE ANTERIOR PITUITARY gland develops from a midline structure contiguous with the primordium of the ventral diencephalon (1). After proliferation from a well defined growth plate, different cell types arise in a distinct spatial and temporal fashion and undergo a highly selective determination and differentiation (2, 3). Thereafter, numerous cells in the pituitary gland are specialized to produce and secrete specific hormones, such as GH, PRL, TSH, LH, FSH, and ACTH (1–4). Failure of these trophic cells to differentiate and/or proliferate during embryogenesis accounts for congenital pituitary disorders that range in severity from panhypopituitarism to milder forms in which one or more of the hormone-secreting cells are absent, causing isolated or combined pituitary hormone deficiency (CPHD) (3–5).

Over the last decade, many transcription factors involved in pituitary development in humans and mice have been characterized, including POU1F1/Pit1, PROP1/Prop1, SF-1/Sf-1, PITX2/Pitx2, NeuroD1, GATA-2, LHX3/Lhx3, TPIT/Tpit, and HESX1/Hesx1 (6–17). Among these factors, HESX1/Hesx1 derived from a homeobox gene expressed in

embryonic stem cell is known to play an important role in the development of the optic nerve as well as the anterior pituitary gland (8, 16, 17). *Hesx1* is intimately involved in orchestrating the expression of other factors involved in pituitary organogenesis (17). During mouse embryogenesis, *Hesx1* expression is localized to the prospective forebrain tissue, which later develops into Rathke's pouch. Consequently, *Hesx1* expression has been reported in all of the hormone-secreting cell types of the anterior pituitary. In addition, *Hesx1* expression is more widespread than that of other pituitary-specific transcription factors (8, 16, 17). Homozygous *Hesx1* gene knockout mice show dramatic central nervous system defects, including absence of the optic vesicles and a small anterior pituitary gland (17). These phenotypes are very similar to the abnormalities observed in a human disorder called septo-optic dysplasia (SOD) (18–20). A number of patients with SOD and other patients with a variety of pituitary disorders were screened, and to date four different missense mutations in seven patients have been reported that are responsible for severe SOD, relatively mild CPHD, or isolated GH deficiency (17, 21, 22). Here, we report the identification of a novel heterozygous insertion mutation in the *HESX1* in a Japanese patient with sporadic pituitary and optic nerve hypoplasia.

Abbreviations: CPHD, Combined pituitary hormone deficiency; MRI, magnetic resonance imaging; SOD, septo-optic dysplasia.

## Materials and Methods

### Pituitary hormone assessment

Free T<sub>4</sub>, free T<sub>3</sub>, and TSH levels were determined by a commercially available chemiluminescent immunoassay (Ciba Corning, Inc., Medfield, MA). Serum cortisol was measured by RIA (Amerlex RIA, Ortho Clinical Diagnostics Co., Tokyo, Japan). Plasma ACTH was determined by radioimmunoassay (ACTH IRMA Mitsubishi, Tokyo Mitsubishi Chemical Co., Tokyo, Japan). GH provocative tests were performed using arginine (0.5 g/kg, iv; Morinaga Co., Tokyo, Japan), insulin-induced hypoglycemia (0.05 U/kg, iv; Eli Lilly & Co., Indianapolis, IN), and GHRH (1 μg/kg, iv; Sumitomo Pharma Co., Osaka, Japan). GH levels were determined by RIA (Dai-Ichi Radioisotope Co., Tokyo, Japan). LH and FSH were measured in response to GnRH (2 μg/kg, iv; Tanabe Pharma Co., Tokyo, Japan). LH and FSH levels were determined by time-resolved fluoroimmunoassay (Delphia, Wallac, Inc., Turku, Finland).

### DNA amplification and sequence analysis

Informed consent to participate in the study was obtained from the parents. Genomic DNA was extracted from peripheral leukocytes as described previously (23). Each exon of *HESX1* was amplified by PCR using primers previously described (17). The PCR conditions consisted of 9 min at 94 C, followed by 30 cycles of 30 sec at 94 C, 30 sec at 52 C, and 30 sec at 72 C in a Perkin-Elmer Gene Amp PCR System 2400 thermal cycler (PE Applied Biosystems, Foster City, CA). After amplification, the PCR products were purified from low melting agarose gel (23), and the purified products were sequenced directly with an ABI PRISM Dye Terminator Cycle Sequencing Kit and an ABI 373A automated fluorescent sequencer (PE Applied Biosystems) from both strands (23).

To confirm the mutation, the PCR products were subcloned into pCR 2.1 vector (Invitrogen, San Diego, CA). The resulting construct was used

to transform *Escherichia coli* strain JM109 (Promega Corp., Madison, WI). Both strands of positive clones were sequenced with the same primers using PCR.

### Case Report

The patient is a 2-yr-old Japanese boy born at 40 wk gestation by vaginal delivery to nonconsanguineous parents. The pregnancy and delivery were without complications. His birth weight was 2764 g (−0.8 SD for the Japanese population), and length was 46.5 cm (−1.7 SD for the Japanese population). Ten hours after birth he presented with apnea and cyanosis and was found to be hypoglycemic (0.78 mmol/liter). Physical examination showed a small penis and bilateral undescended testes. Intravenous glucose infusion was started to maintain normoglycemia. As he had a small penis and hypoglycemia, he was suspected of having congenital hypopituitarism and was referred to our hospital at 14 d of age for further endocrinological evaluation. At this time his hypoglycemic episodes resolved, and he did not reveal failure to thrive. His baseline serum free T<sub>4</sub>, free T<sub>3</sub>, and TSH levels were low (3.2 pmol/liter, 1.2 pmol/liter, and 0.87 μU/ml, respectively). His serum cortisol level was 6.5 nmol/liter, and plasma ACTH was 2.2 pmol/liter (Table 1). Repeated measurements of serum cortisol and plasma ACTH concentrations remained low. Brain magnetic resonance imaging (MRI) examination at 20 d of age revealed a hypoplastic anterior pituitary, ectopic posterior lobe, and left optic nerve hypoplasia (Fig. 1). Hypothyroidism was evident, and replacement therapy of thyroid hormone was commenced. Hydrocortisone (5 mg/d) was also initiated to avoid the consequences of adrenal insufficiency. After initiation of treatment, he grew well, but by 5 months of age his growth gradually decelerated. At 7 months of age, arginine, insulin-induced hypoglycemia, and GHRH stimulations were performed. Arginine and insulin tolerance tests showed low stimulated GH levels; however, serum GH increased after GHRH stimulation (Table 1). It was speculated

**TABLE 1.** Endocrinological findings

|                                               |          | Normal range |                                              | Normal range (basal) |
|-----------------------------------------------|----------|--------------|----------------------------------------------|----------------------|
| Free T <sub>4</sub> (pmol/liter) <sup>a</sup> | 3.2      | 9.0–21.9     | LH (IU/liter) <sup>b</sup> GnRH stimulation  | 0.06→0.21            |
| Free T <sub>3</sub> (pmol/liter) <sup>a</sup> | 1.2      | 3.4–6.3      | FSH (IU/liter) <sup>b</sup> GnRH stimulation | 0.07→0.84            |
| TSH (μU/liter) <sup>a</sup>                   | 0.87     | 0.3–3.50     |                                              |                      |
| GH (μg/liter) <sup>b</sup>                    |          |              |                                              |                      |
| Insulin-induced hypoglycemia                  | 0.69→3.1 |              | ACTH (pmol/liter) <sup>a</sup>               | 2.2                  |
| Arginine stimulation                          | 1.4→5.1  |              | Cortisol (nmol/liter) <sup>a</sup>           | 6.5                  |
| GHRH stimulation                              | 2.3→36.1 |              |                                              | 3.88–7.82            |
|                                               |          |              |                                              | 213–672              |

<sup>a</sup> These values were determined at 7 d of age as described in *Materials and Methods*.

<sup>b</sup> These stimulation tests were performed at 7 months of age, and these values were measured as described in *Materials and Methods*.

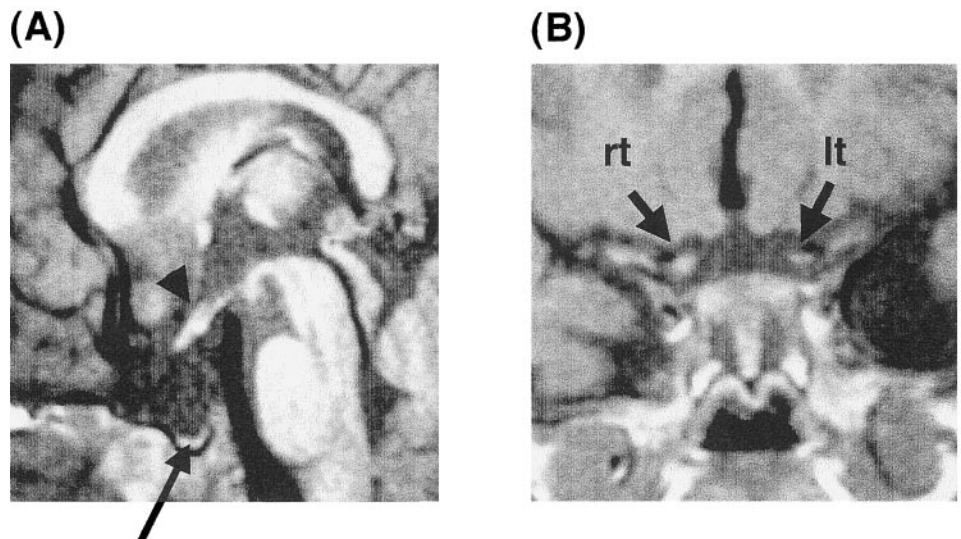

**FIG. 1.** A, Sagittal image showing a hypoplastic anterior pituitary (arrow) and an ectopic posterior lobe (arrowhead). B, Coronal image demonstrating left optic nerve hypoplasia (lt).

that these findings represent a combined hypothalamic-pituitary defect. LH and FSH levels after GnRH stimulation did not increase (Table 1). GH replacement therapy was commenced at this stage, and the patient responded well (Fig. 2). At 2 yr of age his body weight is 10.2 kg, and his height is 80.8 cm ( $-1.0$  sd for normal Japanese boys).

#### Gene sequencing results

We identified a heterozygous two-base insertion in exon 2 of *HESX1* (306/307insAG; Fig. 3). This mutation (TTGAAAAGAGAGTTGAGT→TTGAAAAGAGAGAGTTGAGT) may have occurred by slipped strand mispairing (24). The insertion altered an open reading frame

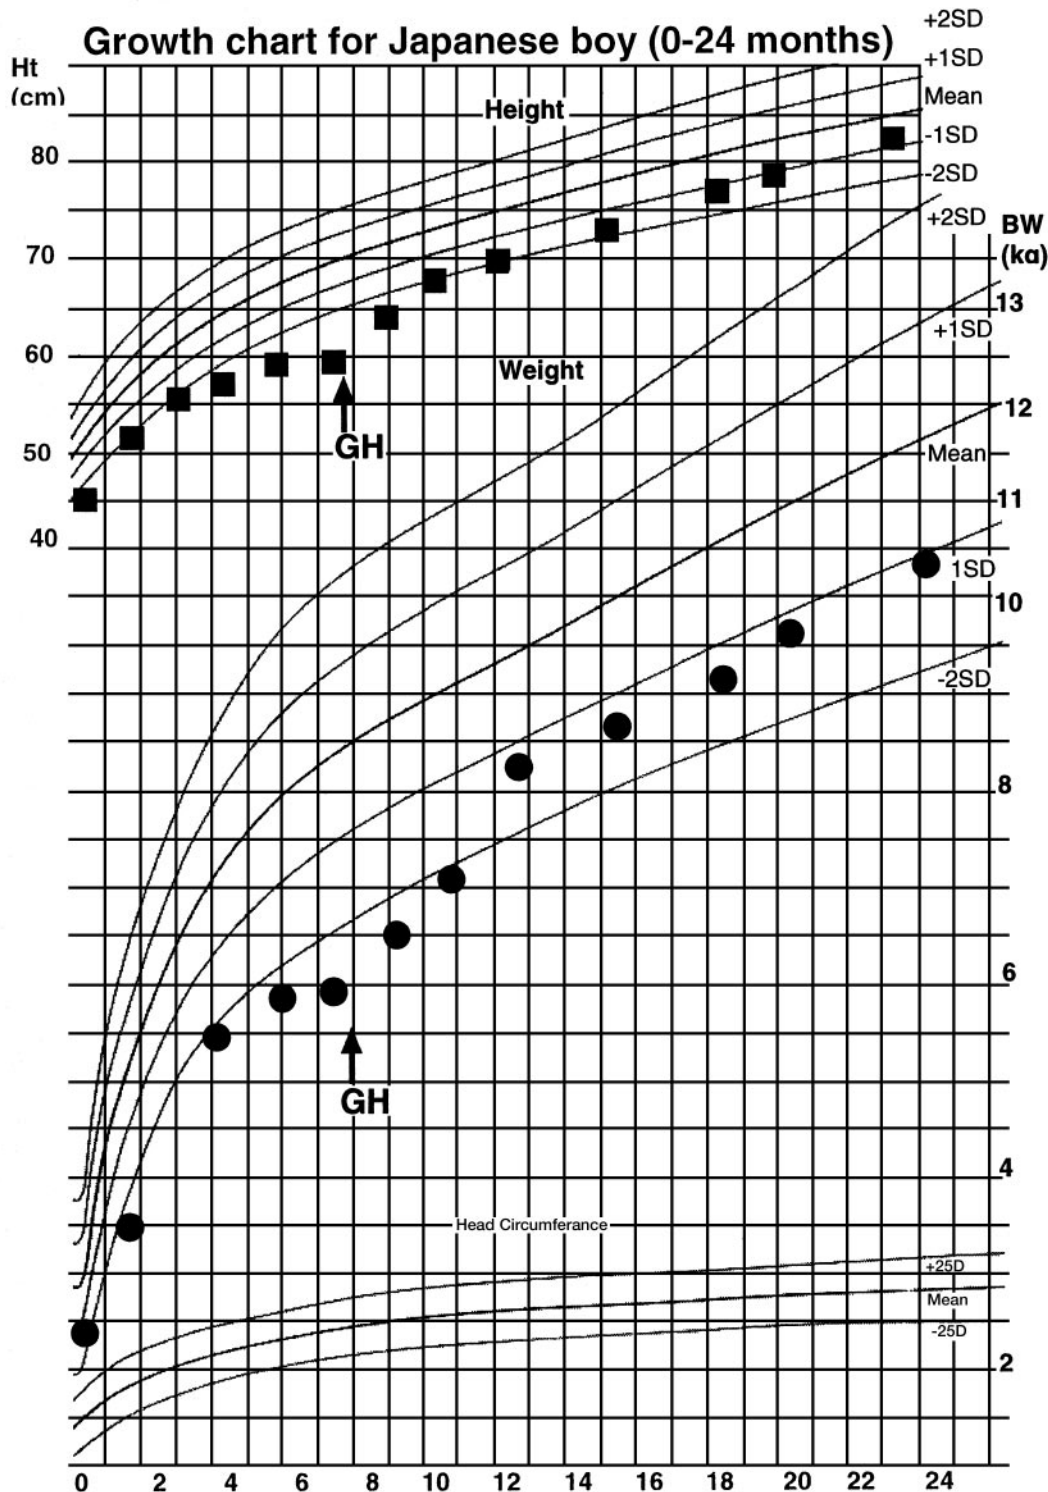

FIG. 2. Growth curve of the patient.

introducing a stop codon in the following codon (Fig. 3). DNA sequencing on the opposite strand also identified the identical mutation. We then subcloned PCR products and sequenced. Ten colonies had the mutant alleles, and seven had the wild-type alleles (data not shown). Fifty normal Japanese subjects did not harbor this mutation. Family analysis demonstrated that neither of his parents harbored the insertion, indicating that the mutation had arisen *de novo*.

### Discussion

We present a sporadic case of a Japanese patient who had a heterozygous insertion mutation of *HESX1*. It is clear that the affected patient has a *de novo* insertion mutation, because neither parent exhibits mutation, and the DNA sequence shows that he does not have loss of heterozygosity at *HESX1*.

As our patient showed hypoglycemia soon after birth and had micropenis, he was suspected to have GH, LH, and FSH deficiencies, which were later confirmed by provocative tests. In addition, laboratory findings indicated hypothyroidism caused by TSH deficiency. Unlike previous reported patients with heterozygous *HESX1* mutations (21, 22), it is likely that our case also had ACTH deficiency. Hypoglycemia at birth or in the first months of life is the most common complaint leading to early diagnosis of GH deficiency (25,

26). However, it has been reported that ACTH/cortisol deficiency often accompanies congenital GH deficiency with hypoglycemia (26). In addition, the corticotrophs are the first hormone-producing cells of the pituitary to reach terminal differentiation and expression of proopiomelanocortin starts in corticotrophs on about d 12.5 of embryonic development in the anterior pituitary of the mouse (15, 27). *Hesx1* expression begins on d 8.5 of mouse embryogenesis, and its expression is later spread to all of the hormone-secreting cell types of the anterior pituitary (17). In homozygous *Hesx1* knockout mice, a striking dysmorphogenesis is evident after d 11.5 of mouse embryogenesis (17). Taken together, these data suggest that *HESX1/Hesx1* may influence corticotroph differentiation, resulting in ACTH deficiency that requires further investigation in these types of patients.

We identified a frameshift mutation, resulting in a premature stop codon in exon 2 of *HESX1*. To date, *HESX1* mutations have been found in seven patients from five kindreds with various clinical presentations of pituitary hormone deficiency and MRI findings; however, all of these were missense mutations (Table 2). One mutation (R160C) was identified as homozygous in siblings with a severe form

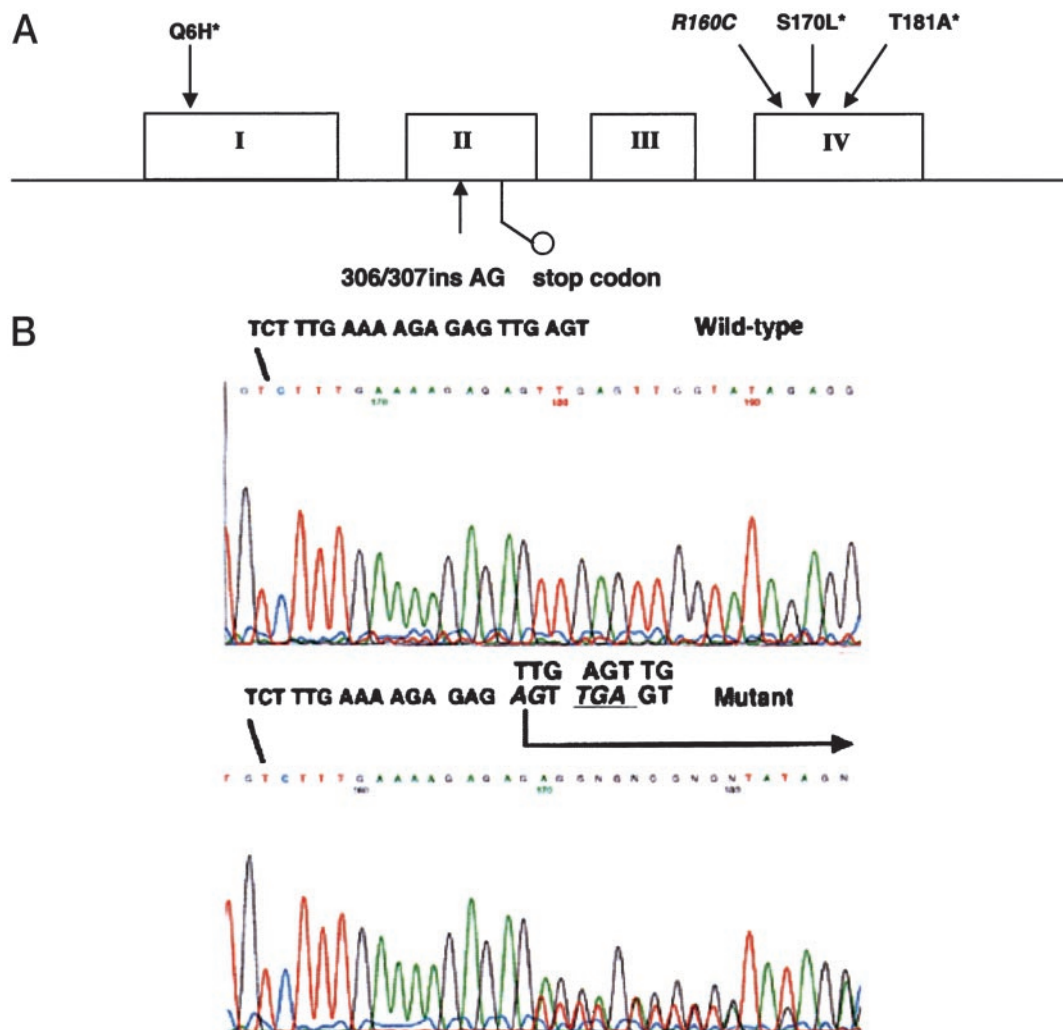

FIG. 3. A, Schematic representation of the *HESX1* gene. Boxes denote numbered exons. Four previously reported missense mutations and the mutation in this study (*italics*) are displayed. The insertion altered an open reading frame, introducing a stop codon in the following codon (*circle*) Asterisks indicate heterozygous mutations. Only the R160C mutation was identified in the homozygous state. B, A schema of the protein and functional domains of *HESX1*. C, Insertion of AG in exon 2 (306/307insAG). This insertion introduces a stop codon in the following codon.

**TABLE 2.** MRI and endocrine findings and the mutations of the *HESX1*

| Case             | MRI                                                                                     | Deficient hormones                | Mutations of the <i>HESX1</i> gene                            |
|------------------|-----------------------------------------------------------------------------------------|-----------------------------------|---------------------------------------------------------------|
| 1-1 <sup>a</sup> | Agenesis of corpus callosum, optic nerve hypoplasia                                     | Panhypopituitarism                | R160C <sup>b</sup> homozygous                                 |
| 1-2 <sup>a</sup> | Agenesis of corpus callosum, optic nerve hypoplasia                                     | Panhypopituitarism                | R160C <sup>b</sup> homozygous                                 |
| 2-1 <sup>c</sup> | Bilateral optic nerve hypoplasia                                                        | GH                                | S170L heterozygous                                            |
| 2-2 <sup>c</sup> | Normal                                                                                  | GH                                | S170L heterozygous                                            |
| 3 <sup>c</sup>   | Anterior pituitary hypoplasia                                                           | GH                                | T181A heterozygous                                            |
| 4 <sup>c</sup>   | Anterior pituitary hypoplasia, ectopic posterior pituitary                              | GH, TSH, LH/FSH                   | Q6H heterozygous                                              |
| 5 <sup>d</sup>   | Anterior pituitary hypoplasia, undescended posterior pituitary                          | GH                                | S170L heterozygous                                            |
| 6 <sup>e</sup>   | Left optic nerve hypoplasia, anterior pituitary hypoplasia, ectopic posterior pituitary | GH, TSH, LH/FSH<br>ACTH(probable) | 306/307Ins AG (introduce a premature stop codon) heterozygous |

Patients 1-1 and 1-2 and patients 2-1 and 2-2 were siblings.

<sup>a</sup> Siblings were derived from Dattani *et al.* (17).

<sup>b</sup> This mutation was homozygous, and the other mutations were heterozygous.

<sup>c</sup> These patients were from Thomas *et al.* (21).

<sup>d</sup> This patient was derived from Brickman *et al.* (22).

<sup>e</sup> This is our case.

of SOD and panhypopituitarism, and *in vitro* analysis revealed that the R160C mutant may act as a null allele (17). In contrast, patients with the other three mutations of the *HESX1* gene (Q6H, S170L, and T181A) were heterozygous and had variable degrees of hypopituitarism, ranging from isolated GH deficiency to CPHD (21). Three patients with S170L showed highly variable phenotypes in terms of the presence of MRI findings and optic nerve hypoplasia (21, 22). It is speculated that milder phenotypic expression in heterozygotes compared with homozygotes is due to a gene dosage effect. This is supported by the finding that the majority of heterozygous *Hesx1* knockout mice do not have a severe phenotype (17, 21). In our patient the degree of CPHD and MRI findings was milder than in the homozygous case, but was more severe than in the heterozygous patients. The exact mechanism for this is unknown. As mentioned, gene dosage-related phenotypic differences may be an explanation for this. Alternatively, as our mutation produces a premature stop codon in exon 2, the mutant protein will lack a carboxyl-terminally truncated protein of 102 amino acids; however, the amino-terminal region of the mutant may be translated. Brickman *et al.* (22) have shown that the amino-terminal region (a minimal 36 amino acids) of *Hesx1* contains a repressor/dimerization domain. It is plausible that the mutant N-terminal protein generated in this patient exerts a dominant negative or modulator effect by interacting with the wild-type protein, causing the disease. This requires further study.

In conclusion, our results indicate that a *de novo* heterozygous insertion mutation introducing a premature codon in exon 2 of *HESX1* causes pituitary and optic nerve hypoplasia and severe CPHD. Further identification of the *HESX1* mutations will expand our understanding of the clinical heterogeneity and inheritance patterns of hypopituitarism.

### Acknowledgments

We thank Dr. Pinchas Cohen (Department of Pediatrics, Mattell Children's Hospital, University of California, Los Angeles, CA) for critical review of the manuscript.

Received May 28, 2002. Accepted September 16, 2002.

Address all correspondence and requests for reprints to: Kenji Fujieda, M.D., Ph.D., Department of Pediatrics, Asahikawa Medical College, 2-1-1 Midorigaoka, Higashi, Asahikawa 078-8510, Japan. E-mail: ken-fuji@asahikawa-med.ac.jp.

### References

- Couly G, Le Douarin NM 1988 The fate map of the cephalic neural primordium at the presomitic to the 3-somite stage in the avian embryo. *Development* 103(Suppl):101–113
- Voss JW, Rosenfeld MG 1992 Anterior pituitary development: short tales from dwarf mice. *Cell* 70:527–530
- Watkins-Chow DE, Camper SA 1998 How many homeobox genes does it take to make a pituitary gland. *Trends Genet* 14:284–290
- Sheng HZ, Westphal H 1999 Early steps in pituitary organogenesis. *Trends Genet* 15:236–240
- Parks JS, Brown MR, Hurley DL, Phelps CJ, Wajnrajch MP 1999 Heritable disorders of pituitary development. *J Clin Endocrinol Metab* 84:4362–4370
- Pfaffle RW, DiMattia GE, Parks JS, Brown MR, Wit JM, Jansen M, Van der Nat H, Van den Brande JL, Rosenfeld MG, Ingraham HA 1992 Mutation of the POU-specific domain of Pit-1 and hypopituitarism without pituitary hypoplasia. *Science* 257:1118–1121
- Ingraham HA, Lala DS, Ikeda Y, Luo X, Shen WH, Nachtigal MW, Abbud R, Nilson JH, Parker KL 1994 The nuclear receptor steroidogenic factor 1 acts at multiple levels of the reproductive axis. *Genes Dev* 8:2302–2312
- Hermesz E, Mackem S, Mahon KA 1996 Rpx: a novel anterior-restricted homeobox gene progressively activated in the prechordal plate, anterior neural plate and Rathke's pouch of the mouse embryo. *Development* 122:41–52
- Lamonerie T, Tremblay JJ, Lanctot C, Therrien M, Gauthier Y, Drouin J 1996 PTX1, a *bicoid*-related homeobox transcription factor involved in transcription of pro-opiomelanocortin (POMC) gene. *Genes Dev* 10:1284–1295
- Semina EV, Reiter R, Leysens NJ, Alward WL, Small KW, Datson NA, Siegel-Bartelt J, Bierke-Nelson D, Bitoun P, Zabel BU, Carey JC, Murray JC 1996 Cloning and characterization of a novel bicoid-related homeobox transcription factor gene, RIEG, involved in Rieger syndrome. *Nat Genet* 14:392–399
- Poulin G, Turgeon B, Drouin J 1997 NeuroD1/BETA2 contributes to cell-specific transcription of the POMC gene. *Mol Cell Biol* 17:6673–6682
- Wu W, Cogan JD, Pfaffle RW, Dasen JS, Frisch H, O'Connell SM, Flynn SE, Brown MR, Mullis PE, Parks JS, Phillips III JA, Rosenfeld MG 1998 Mutations in *PROPI* cause familial combined pituitary hormone deficiency. *Nat Genet* 18:147–149
- Dasen JS, O'Connell SM, Flynn SE, Treier M, Gleiberman AS, Szeto DP, Hooshmand F, Aggarwal AK, Rosenfeld MG 1999 Reciprocal interactions of Pit1 and GATA2 mediate signaling gradient-induced determination of pituitary cell types. *Cell* 97:587–598
- Netchine I, Sobrier ML, Krude H, Schnabel D, Maghnie M, Marcos E, Duriez B, Cacheux V, Moers A, Goossens M, Gruters A, Amselem S 2000 Mutations in *LHX3* result in a new syndrome revealed by combined pituitary hormone deficiency. *Nat Genet* 5:182–186
- Lamolet B, Pulichino AM, Lamonerie T, Gauthier Y, Brue T, Enjalbert A,

- Drouin J** 2001 A pituitary cell-restricted T box factor, Tpit, activates POMC transcription in cooperation with Pitx homeoproteins. *Cell* 104:849–859
16. **Thomas PQ, Johnson BV, Rathjen J, Rathjen PD** 1995 Sequence, genomic organization, and expression of the novel homeobox gene, *HESX1*. *J Biol Chem* 270:3869–3875
  17. **Dattani MT, Martinez-Barbera JP, Thomas PQ, Brickman JM, Gupta R, Martensson IL, Toresson H, Fox M, Wales JK, Hindmarsh PC, Krauss S, Beddington RS, Robinson IC** 1998 Mutations in the homeobox genes *HESX1/Hesx1* associated with septo-optic dysplasia in human and mouse. *Nat Genet* 19:125–133
  18. **Arslanian SA, Rothfus WE, Foley Jr TP, Becker DJ** 1984 Hormonal, metabolic, and neuroradiologic abnormalities associated with septo-optic dysplasia. *Acta Endocrinol (Copenh)* 107:282–288
  19. **Izenberg N, Rosenblum M, Parks JS** 1984 The endocrine spectrum of septo-optic dysplasia. *Clin Pediatr* 23:632–636
  20. **Wales JKH, Quarrell OWJ** 1996 Evidence for possible Mendelian inheritance of septo-optic dysplasia. *Acta Paediatr* 85:91–92
  21. **Thomas PQ, Dattani MT, Brickman JM, McNay D, Warne G, Zacharin M, Cameron F, Hurst J, Woods K, Dunger D, Stanhope R, Forrest S, Robinson IC, Beddington RS** 2001 Heterozygous *HESX1* mutations associated with isolated congenital pituitary hypoplasia and septo-optic dysplasia. *Hum Mol Genet* 10:39–45
  22. **Brickman JM, Clements M, Tyrell R, McNay D, Woods K, Warner J, Stewart A, Beddington RS, Dattani M** 2001 Molecular effects of novel mutations in *Hesx1/HESX1* associated with human pituitary disorders. *Development* 128:5189–5199
  23. **Nakae J, Tajima T, Kusuda S, Kohda N, Okabe T, Shinohara N, Kato M, Murashita M, Mukai T, Imanaka K, Fujieda K** 1996 Truncation at C-terminus of the DAX-1 protein impairs its biological actions in patients with X-linked adrenal hypoplasia congenita. *J Clin Endocrinol Metab* 81:3680–3685
  24. **Levinson G, Gutman GA** 1987 Slipped-strand mispairing: a major mechanism for DNA sequence evolution. *Mol Biol Evol* 4:203–221
  25. **Blethen SL** 1996 Hypopituitarism. In: Lifshitz F, ed. *Pediatric endocrinology*. New York: Marcel Dekker; 19–23
  26. **Pena-Almazan S, Buchlis J, Miller S, Shine B, MacGillivray M** 2001 Linear growth characteristics of congenitally GH-deficient infants from birth to one year of age. *J Clin Endocrinol Metab* 86:5691–5694
  27. **Japon MA, Rubinstein M, Low MJ** 1994 In situ hybridization analysis of anterior pituitary hormone gene expression during fetal mouse development. *J Histochem Cytochem* 42:1117–1125

---

**18th International Diabetes Federation Congress**  
**August 24–29, 2003**  
**Paris, France**

Three major components of the Consensus:

- A “Basic Research and Clinical Research & Care” programme focusing on advanced scientific knowledge in all aspects of Diabetology.
- A “Life with Diabetes” forum dedicated to people with Diabetes.
- Presentations and debates focusing on “Professions Allied to Medicine” and “Healthcare Organization.”

For further information, please visit [www.idfparis2003.org](http://www.idfparis2003.org).
